# Supplementary material for: Microclimatic conditions at forest edges have significant impacts on vegetation structure in large Atlantic forest fragments
Source: Springer Nature journal article supplement (doi:10.1007/s10531-015-0961-1), 2015-07-13
Supplement: 10531_2015_961_MOESM1_ESM.doc [file 10531_2015_961_MOESM1_ESM.doc]

**Electronic supplementary material**

**MICROCLIMATE CONDITIONS AT FOREST EDGES HAVE SIGNIFICANT IMPACTS ON VEGETATION STRUCTURE IN LARGE ATLANTIC FOREST FRAGMENTS**

LUIZ FERNANDO SILVA MAGNAGO1,2,3, MARIANA FERREIRA ROCHA1,2,3, LEILA MEYER4, SEBASTIÃO VENÂNCIO MARTINS5, JOÃO AUGUSTO ALVES MEIRA-NETO1

1Laboratory of Ecology and Evolution of Plants - LEEP, Universidade Federal de Viçosa, Campus UFV, Viçosa 36570-900, Minas Gerais, Brazil.

2 Centre for Tropical Environmental and Sustainability Science (TESS) and School of Marine and Tropical Biology, James Cook University, Cairns, Queensland 4878, Australia.

3 Setor de Ecologia, Universidade Federal de Viçosa, Edifício Chotaro Shimoya - Campus Universitário, Cep 36570-900, Viçosa, MG, Brasil.

4Universidade Federal de Minas Gerais, Departamento de Botânica, Avenida Presidente Antônio Carlos, 6627, Pampulha, 31270-901 Belo Horizonte, MG, Brazil.

5Departamento de Engenharia Florestal da Universidade Federal de Viçosa, Campus UFV, Viçosa 36570-900, Minas Gerais, Brazil.

Correspondence to: Luiz Fernando Silva Magnago

**Contents of the supporting material**:

Table S1 - Model selection for the relation between dead trees proportional abundance and microclimatic variables.

Table S2 - Model selection for the relation between basal area and microclimatic variables.

Table S3 - Model selection for the relation between mean height of trees and microclimatic variables.

Table S1 - Model selection for the relation between dead trees proportional abundance and microclimatic variables. We maintain the Moran’s Eigenvector Maps (MEMs) as fixed variables in all models (see Methods section in the main text). DF = Degrees of freedom; LogLik =maximum likelihood. AICc=Akaike Information Criterion for small samples; ΔAICc=difference between the AICc of a given model and that of the best model; Weight = Akaike weights (based on AIC corrected for small sample sizes); Temperature = Maximum air temperature (%); Humidity = Relative air humidity (%); Wind = Maximum wind speed (%).

| **Dead trees ~ Humidity+Temperature+Wind+MEM3+MEM38+MEM16+MEM7+MEM5** | | | | | | | | | | | | | |
| --- | --- | --- | --- | --- | --- | --- | --- | --- | --- | --- | --- | --- | --- |
| **Variable** | **Temperature** | **Humidity** | **Wind** | **MEM 16** | **MEM 3** | **MEM 38** | **MEM 5** | **MEM 7** | **DF** | **LogLik** | **AICc** | **ΔAICc** | **Weight** |
| Dead trees | - | -0.017*** | - | -2.4* | -2.5* | -3.2** | 2.0 | 1.5 | 7 | -61.9 | 140.0 | 0.00 | 0.26 |
| Dead trees | 0.041*** | - | - | -2.3* | -2.8* | -3.2** | 1.8 | 1.5 | 7 | -62.2 | 140.5 | 0.49 | 0.21 |
| Dead trees | - | - | -0.005* | -2.4* | -4.1*** | -3.2** | 1.6 | 1.5 | 7 | -62.3 | 140.7 | 0.71 | 0.18 |
| Dead trees | - | -0.033*** | -0.018 | -2.6* | -2.6* | -3.2** | 2.5* | 1.2 | 8 | -61.1 | 140.9 | 0.92 | 0.17 |
| Dead trees | 0.056 | - | -0.008 | -2.3 | -3.0 | -3.2 | 2.0 | 1.5 | 8 | -61.9 | 142.7 | 2.64 | 0.07 |
| Dead trees | 0.009 | -0.015 | - | -2.4 | -2.4 | -3.2 | 2.0 | 1.5 | 8 | -61.9 | 142.7 | 2.66 | 0.07 |
| Dead trees | -0.004 | -0.034 | -0.018 | -2.6 | -2.6 | -3.2 | 2.5 | 1.2 | 9 | -61.1 | 143.7 | 3.69 | 0.04 |
| Dead trees | - | - | - | - | - | - | - | - | 1 | -79.2 | 160.5 | 20.49 | 0.00 |

* p < 0.05; ** p < 0.01; *** p < 0.001; no symbols means not significant. p values were showed only for models with ΔAICc≤2.

Table S2 - Model selection for the relation between basal area and microclimatic variables. We maintain the Moran’s Eigenvector Maps (MEMs) as fixed variables in all models (see Methods section in the main text). DF = Degrees of freedom; LogLik = maximum likelihood. AICc = Akaike Information Criterion for small samples; ΔAICc = difference between the AICc of a given model and that of the best model; Weight = Akaike weights (based on AIC corrected for small sample sizes); Temperature = Maximum air temperature (%); Humidity = Relative air humidity (%); Wind = Maximum wind speed (%).

| **Basal area ~ Humidity+Temperature+Wind+MEM3+MEM10+MEM50+MEM6** | | | | | | | | | | | | |
| --- | --- | --- | --- | --- | --- | --- | --- | --- | --- | --- | --- | --- |
| **Variable** | **Temperature** | **Humidity** | **Wind** | **MEM 10** | **MEM 3** | **MEM 50** | **MEM 6** | **DF** | **LogLik** | **AICc** | **ΔAICc** | **Weight** |
| Basal area | -0.147*** | 0.022*** | -0.015* | -1.57* | 0.91 | 1.87** | 1.35* | 9 | -49.90 | 121.4 | 0 | 0.37 |
| Basal area | -0.098*** |  | -0.011 | -1.48* | 0.57 | 1.92** | 1.51* | 8 | -51.44 | 121.7 | 0.31 | 0.32 |
| Basal area | -0.120*** |  |  | -1.37* | 0.89 | 1.93** | 1.55* | 7 | -53.21 | 122.6 | 1.18 | 0.21 |
| Basal area | -0.144 | 0.009 |  | -1.40 | 1.10 | 1.91 | 1.48 | 8 | -52.90 | 124.6 | 3.23 | 0.07 |
| Basal area |  |  | -0.017 | -1.54 | 2.55 | 1.99 | 1.20 | 7 | -55.46 | 127.1 | 5.69 | 0.02 |
| Basal area |  | 0.005 | -0.015 | -1.51 | 2.23 | 1.99 | 1.28 | 8 | -55.33 | 129.5 | 8.09 | 0.01 |
| Basal area |  | 0.017 |  | -1.34 | 2.38 | 2.03 | 1.41 | 7 | -57.69 | 131.5 | 10.14 | 0.00 |
| Basal area |  |  |  |  |  |  |  | 2 | -78.07 | 160.4 | 38.96 | 0.00 |

* p < 0.05; ** p < 0.01; *** p < 0.001; no symbols means not significant. p values were showed only for models with ΔAICc≤2.

Table S3 - Model selection for the relation between mean height of trees and microclimatic variables. We maintain the Moran’s Eigenvector Maps (MEMs) as fixed variables in all models (see Methods section in the main text). DF = Degrees of freedom; LogLik = maximum likelihood. AICc = Akaike Information Criterion for small samples; ΔAICc = difference between the AICc of a given model and that of the best model; Weight = Akaike weights (based on AIC corrected for small sample sizes); Temperature = Maximum air temperature (%); Humidity = Relative air humidity (%); Wind = Maximum wind speed (%).

| **Mean height** **~ Humidity+Temperature+Wind+MEM1+MEM3+MEM4** | | | | | | | | | | | |
| --- | --- | --- | --- | --- | --- | --- | --- | --- | --- | --- | --- |
| **Variable** | **Temperature** | **Humidity** | **Wind** | **MEM 1** | **MEM 3** | **MEM 4** | **DF** | **LogLik** | **AICc** | **ΔAICc** | **Weight** |
| Mean height | -0.342* | 0.103*** | -0.036*** | 5.98*** | 1.76 | -6.97*** | 8 | -83.0 | 184.9 | 0 | 0.93 |
| Mean height | -0.369 | 0.089 | - | 6.95 | 2.73 | -8.57 | 7 | -87.1 | 190.3 | 5.44 | 0.06 |
| Mean height | - | - | -0.034 | 3.25 | 1.49 | -6.53 | 6 | -92.2 | 197.9 | 13.04 | 0.00 |
| Mean height | -0.104 | - | -0.026 | 3.34 | -0.47 | -6.90 | 7 | -90.9 | 197.9 | 13.05 | 0.00 |
| Mean height | - | 0.030 | -0.042 | 3.95 | 3.41 | -6.31 | 7 | -91.1 | 198.3 | 13.41 | 0.00 |
| Mean height | -0.148 | - | - | 4.34 | 0.49 | -8.12 | 6 | -92.7 | 198.9 | 14.03 | 0.00 |
| Mean height | - | 0.007 | - | 4.92 | 4.70 | -8.13 | 6 | -95.3 | 204.2 | 19.34 | 0.00 |
| Mean height | - | - | - | - | - | - | 2 | -119.6 | 243.3 | 58.43 | 0.00 |

* p < 0.05; ** p < 0.01; *** p < 0.001; no symbols means not significant. p values were showed only for models with ΔAICc≤2.
